# Supplementary material for: The Homeobox Protein CEH-23 Mediates Prolonged Longevity in Response to Impaired Mitochondrial Electron Transport Chain in C. elegans
Source: PLoS Biol. 2011 Jun 21;9(6):e1001084. doi: 10.1371/journal.pbio.1001084 (PMC3119657; doi:10.1371/journal.pbio.1001084)
Supplement: Table S1 — Quantitative data and statistical analyses of mean adult lifespan presented in Figure 1 and Tables 1 and 2. (PDF) [file pbio.1001084.s007.pdf]

**Table S1: Quantitative data and statistical analyses of mean adult lifespan presented in Figure 1 and Tables 1 and 2.**

| Strain                                                                | Mean<br>adulthood<br>lifespan<br>+/-<br>s.d<br>(days) | Censored<br>worms<br>(%) | n   | Mean<br>adulthood<br>lifespan<br>+/-<br>s.d<br>(days) | censored<br>worms<br>(%) | n   | p-value<br>(stratified log-<br>rank test)<br>compared to<br>control RNAi | Number<br>of<br>experiments |
|-----------------------------------------------------------------------|-------------------------------------------------------|--------------------------|-----|-------------------------------------------------------|--------------------------|-----|--------------------------------------------------------------------------|-----------------------------|
|                                                                       | Control RNAi                                          |                          |     | <i>dve-1</i> RNAi                                     |                          |     |                                                                          |                             |
| <i>isp-1</i><br>( <i>qm150</i> );<br><i>ctb-1</i><br>( <i>qm189</i> ) | 27.05<br>+/-<br>0.34                                  | 13.8                     | 355 | 12.02<br>+/-<br>0.24                                  | 33.5                     | 266 | 0.000                                                                    | 3                           |
| Wild-type                                                             | 19.50<br>+/-<br>0.28                                  | 17.2                     | 186 | 9.07<br>+/-<br>0.17                                   | 43.5                     | 214 | 0.000                                                                    | 2                           |
| <i>daf-16</i><br>( <i>mgDf47</i> )                                    | 11.45<br>+/-<br>0.20                                  | 8.7                      | 69  | 7.47<br>+/-<br>0.19                                   | 9.7                      | 62  | 0.000                                                                    | 1                           |
| <i>age-1</i><br>( <i>hx546</i> )                                      | 25.62<br>+/-<br>0.72                                  | 28.2                     | 85  | 12.09<br>+/-<br>0.38                                  | 47.5                     | 80  | 0.000                                                                    | 1                           |
|                                                                       | Control RNAi                                          |                          |     | <i>lin-40</i> RNAi                                    |                          |     |                                                                          |                             |
| <i>isp-1</i><br>( <i>qm150</i> );<br><i>ctb-1</i><br>( <i>qm189</i> ) | 25.99<br>+/-<br>0.29                                  | 8.8                      | 330 | 13.62<br>+/-<br>0.41                                  | 22.5                     | 271 | 0.000                                                                    | 3                           |
| Wild-type                                                             | 18.90<br>+/-<br>0.20                                  | 3.9                      | 255 | 15.55<br>+/-<br>0.36                                  | 28.1                     | 128 | 0.000                                                                    | 2                           |
| <i>daf-16</i><br>( <i>mgDf47</i> )                                    | 12.51<br>+/-<br>0.16                                  | 3.3                      | 90  | 10.29<br>+/-<br>0.15                                  | 12.7                     | 102 | 0.000                                                                    | 2                           |
| <i>age-1</i>                                                          | 32.38                                                 | 7.8                      | 64  | 14.02                                                 | 6.1                      | 49  | 0.000                                                                    | 2                           |

|                                                                       |                      |      |     |                      |      |     |            |
|-----------------------------------------------------------------------|----------------------|------|-----|----------------------|------|-----|------------|
| <i>(hx546)</i>                                                        | +/-<br>0.84          |      |     | +/-<br>0.47          |      |     |            |
|                                                                       | Control RNAi         |      |     | <i>nhr-49</i> RNAi   |      |     |            |
| <i>isp-1</i><br>( <i>qm150</i> );<br><i>ctb-1</i><br>( <i>qm189</i> ) | 27.57<br>+/-<br>0.33 | 4.0  | 225 | 14.91<br>+/-<br>0.20 | 4.1  | 172 | 0.000<br>3 |
| Wild-type                                                             | 23.15<br>+/-<br>0.33 | 5.3  | 75  | 10.29<br>+/-<br>0.25 | 0.0  | 81  | 0.000<br>2 |
| <i>daf-16</i><br>( <i>mgDf47</i> )                                    | 11.29<br>+/-<br>0.20 | 7.9  | 63  | 7.00<br>+/-<br>0.21  | 0.0  | 88  | 0.000<br>2 |
| <i>age-1</i><br>( <i>hx546</i> )                                      | 24.12<br>+/-<br>0.59 | 14.3 | 147 | 16.49<br>+/-<br>0.63 | 35.8 | 187 | 0.000<br>3 |
|                                                                       | Control RNAi         |      |     | <i>C52B9.2</i> RNAi  |      |     |            |
| <i>isp-1</i><br>( <i>qm150</i> );<br><i>ctb-1</i><br>( <i>qm189</i> ) | 26.39<br>+/-<br>0.26 | 13.8 | 516 | 16.32<br>+/-<br>0.16 | 5.3  | 339 | 0.000<br>4 |
| Wild-type                                                             | 18.77<br>+/-<br>0.20 | 10.9 | 350 | 14.54<br>+/-<br>0.11 | 3.2  | 309 | 0.000<br>3 |
| <i>daf-16</i><br>( <i>mgDf47</i> )                                    | 11.62<br>+/-<br>0.13 | 6.0  | 149 | 10.22<br>+/-<br>0.12 | 1.2  | 169 | 0.000<br>3 |
| <i>age-1</i><br>( <i>hx546</i> )                                      | 24.59<br>+/-<br>0.55 | 18.8 | 149 | 23.13<br>+/-<br>0.46 | 6.3  | 158 | 0.026<br>3 |
| <i>isp-1</i><br>( <i>qm150</i> )                                      | 22.28<br>+/-<br>0.62 | 20.9 | 201 | 15.60<br>+/-<br>0.46 | 3.8  | 106 | 0.000<br>2 |
| <i>clk-1</i><br>( <i>e2519</i> )                                      | 22.83<br>+/-<br>0.22 | 0.0  | 178 | 14.85<br>+/-<br>0.16 | 0.0  | 143 | 0.000<br>2 |
| <i>mev-1</i><br>( <i>kn1</i> )                                        | 12.07<br>+/-<br>0.19 | 9.0  | 246 | 10.62<br>+/-<br>0.23 | 10.7 | 221 | 0.000<br>2 |
| <i>eat-2</i><br>( <i>ad1116</i> )                                     | 22.75<br>+/-<br>0.46 | 1.7  | 121 | 15.95<br>+/-<br>0.27 | 0    | 123 | 0.000<br>2 |
|                                                                       | Control RNAi         |      |     | <i>ZC123.3</i> RNAi  |      |     |            |
| <i>isp-1</i><br>( <i>qm150</i> );                                     | 28.29<br>+/-         | 3.9  | 389 | 17.75<br>+/-         | 6.8  | 322 | 0.000<br>3 |

|                                                                       |                      |      |     |                      |      |     |       |   |
|-----------------------------------------------------------------------|----------------------|------|-----|----------------------|------|-----|-------|---|
| <i>ctb-1</i><br>( <i>qm189</i> )                                      | 0.27                 |      |     | 0.36                 |      |     |       |   |
| Wild-type                                                             | 20.43<br>+/-         | 4.4  | 91  | 11.25<br>+/-         | 65.9 | 88  | 0.000 | 2 |
| <i>daf-16</i><br>( <i>mgDf47</i> )                                    | 0.25<br>12.51<br>+/- | 3.3  | 90  | 0.28<br>11.01<br>+/- | 50.0 | 84  | 0.000 | 2 |
| <i>age-1</i><br>( <i>hx546</i> )                                      | 0.16<br>24.65<br>+/- | 20.5 | 83  | 0.41<br>21.24<br>+/- | 65.6 | 61  | 0.014 | 2 |
|                                                                       | 0.85                 |      |     | 1.02                 |      |     |       |   |
|                                                                       | Control RNAi         |      |     | <i>ceh-20</i> RNAi   |      |     |       |   |
| <i>isp-1</i><br>( <i>qm150</i> );<br><i>ctb-1</i><br>( <i>qm189</i> ) | 24.69<br>+/-         | 7.7  | 169 | 16.77<br>+/-         | 35.7 | 157 | 0.000 | 3 |
| Wild-type                                                             | 0.41<br>18.47<br>+/- | 2.1  | 94  | 0.78<br>16.23<br>+/- | 32.4 | 145 | 0.000 | 2 |
| <i>daf-16</i><br>( <i>mgDf47</i> )                                    | 0.45<br>11.45<br>+/- | 8.7  | 69  | 0.34<br>10.33<br>+/- | 24.7 | 77  | 0.001 | 2 |
| <i>age-1</i><br>( <i>hx546</i> )                                      | 0.20<br>25.62<br>+/- | 28.2 | 85  | 0.23<br>19.78<br>+/- | 61.8 | 68  | 0.000 | 2 |
|                                                                       | 0.72                 |      |     | 1.03                 |      |     |       |   |
|                                                                       | Control RNAi         |      |     | <i>nhr-25</i> RNAi   |      |     |       |   |
| <i>isp-1</i><br>( <i>qm150</i> );<br><i>ctb-1</i><br>( <i>qm189</i> ) | 26.12<br>+/-         | 8.5  | 539 | 17.74<br>+/-         | 13.1 | 275 | 0.000 | 5 |
| Wild-type                                                             | 0.28<br>19.45<br>+/- | 0.9  | 349 | 0.40<br>17.91<br>+/- | 17.4 | 268 | 0.000 | 4 |
| <i>daf-16</i><br>( <i>mgDf47</i> )                                    | 0.16<br>10.57<br>+/- | 0.0  | 70  | 0.26<br>9.68<br>+/-  | 20.8 | 72  | 0.043 | 2 |
| <i>age-1</i><br>( <i>hx546</i> )                                      | 0.37<br>23.02<br>+/- | 3.1  | 129 | 0.33<br>26.16<br>+/- | 18.0 | 50  | 0.001 | 2 |
| <i>isp-1</i><br>( <i>qm150</i> )                                      | 0.49<br>24.43<br>+/- | 19.6 | 135 | 1.48<br>13.04<br>+/- | 17.7 | 102 | 0.000 | 2 |
| <i>clk-1</i><br>( <i>e2519</i> )                                      | 0.49<br>27.01<br>+/- | 0.0  | 114 | 0.52<br>19.08<br>+/- | 21.8 | 110 | 0.000 | 1 |
|                                                                       | 0.41                 |      |     | 0.53                 |      |     |       |   |

|                                                                       |                      |      |     |                            |      |     |       |   |
|-----------------------------------------------------------------------|----------------------|------|-----|----------------------------|------|-----|-------|---|
| <i>mev-1</i><br>( <i>kn1</i> )                                        | 13.86<br>+/-<br>0.23 | 0.5  | 211 | 12.84<br>+/-<br>0.27       | 7.9  | 152 | 0.007 | 2 |
| <i>eat-2</i><br>( <i>ad1116</i> )                                     | 24.28<br>+/-<br>0.35 | 5.7  | 106 | 13.57<br>+/-<br>0.75       | 25.2 | 115 | 0.000 | 1 |
|                                                                       | Control RNAi         |      |     | <b><i>ceh-23</i> RNAi</b>  |      |     |       |   |
| <i>isp-1</i><br>( <i>qm150</i> );<br><i>ctb-1</i><br>( <i>qm189</i> ) | 25.62<br>+/-<br>0.30 | 5.8  | 308 | 18.26<br>+/-<br>0.27       | 7.1  | 210 | 0.000 | 3 |
| Wild-type                                                             | 18.90<br>+/-<br>0.20 | 3.9  | 255 | 21.14<br>+/-<br>0.17       | 0.6  | 158 | 0.000 | 3 |
| <i>daf-16</i><br>( <i>mgDf47</i> )                                    | 12.15<br>+/-<br>0.12 | 3.5  | 170 | 14.91<br>+/-<br>0.19       | 2.6  | 152 | 0.000 | 3 |
| <i>age-1</i><br>( <i>hx546</i> )                                      | 24.12<br>+/-<br>0.59 | 14.3 | 147 | 27.24<br>+/-<br>0.50       | 0.0  | 111 | 0.007 | 3 |
| <i>isp-1</i><br>( <i>qm150</i> )                                      | 22.28<br>+/-<br>0.62 | 20.9 | 201 | 15.80<br>+/-<br>0.34       | 3.4  | 89  | 0.000 | 3 |
| <i>clk-1</i><br>( <i>e2519</i> )                                      | 22.83<br>+/-<br>0.22 | 0.0  | 178 | 15.55<br>+/-<br>0.28       | 2.6  | 115 | 0.000 | 3 |
| <i>mev-1</i><br>( <i>kn1</i> )                                        | 13.70<br>+/-<br>0.19 | 0.9  | 110 | 14.04<br>+/-<br>0.15       | 6.5  | 108 | 0.085 | 2 |
| <i>eat-2</i><br>( <i>ad1116</i> )                                     | 27.70<br>+/-<br>0.23 | 8.6  | 185 | 27.73<br>+/-<br>0.20       | 8.2  | 195 | 0.698 | 2 |
|                                                                       | Control RNAi         |      |     | <b><i>nhr-119</i> RNAi</b> |      |     |       |   |
| <i>isp-1</i><br>( <i>qm150</i> );<br><i>ctb-1</i><br>( <i>qm189</i> ) | 26.24<br>+/-<br>0.31 | 3.4  | 291 | 22.32<br>+/-<br>0.34       | 2.8  | 217 | 0.000 | 3 |
| Wild-type                                                             | 20.41<br>+/-<br>0.30 | 2.6  | 153 | 18.45<br>+/-<br>0.23       | 0.6  | 178 | 0.000 | 3 |
| <i>daf-16</i><br>( <i>mgDf47</i> )                                    | 11.22<br>+/-<br>0.18 | 7.1  | 70  | 10.92<br>+/-<br>0.10       | 3.2  | 126 | 0.053 | 2 |
| <i>age-1</i><br>( <i>hx546</i> )                                      | 26.06<br>+/-         | 4.7  | 193 | 25.54<br>+/-               | 10.0 | 150 | 0.373 | 2 |

|                                                                       |                      |             |  |                      |            |       |   |
|-----------------------------------------------------------------------|----------------------|-------------|--|----------------------|------------|-------|---|
|                                                                       | 0.53                 |             |  | 0.57                 |            |       |   |
|                                                                       | Control RNAi         |             |  | <i>nhr-265</i> RNAi  |            |       |   |
| <i>isp-1</i><br>( <i>qm150</i> );<br><i>ctb-1</i><br>( <i>qm189</i> ) | 26.09<br>+/-<br>0.32 | 6.6<br>271  |  | 23.02<br>+/-<br>0.31 | 4.6<br>303 | 0.000 | 4 |
| Wild-type                                                             | 19.40<br>+/-<br>0.18 | 1.1<br>353  |  | 20.33<br>+/-<br>0.16 | 4.0<br>351 | 0.000 | 5 |
| <i>daf-16</i><br>( <i>mgDf47</i> )                                    | 11.58<br>+/-<br>0.12 | 5.3<br>152  |  | 11.02<br>+/-<br>0.13 | 4.9<br>122 | 0.002 | 3 |
| <i>age-1</i><br>( <i>hx546</i> )                                      | 26.93<br>+/-<br>0.43 | 4.0<br>297  |  | 28.36<br>+/-<br>0.63 | 7.4<br>215 | 0.003 | 3 |
| <i>isp-1</i><br>( <i>qm150</i> )                                      | 25.53<br>+/-<br>1.45 | 1.9<br>53   |  | 23.50<br>+/-<br>1.18 | 12.5<br>40 | 0.022 | 2 |
| <i>clk-1</i><br>( <i>e2519</i> )                                      | 23.72<br>+/-<br>0.31 | 0.0<br>117  |  | 24.48<br>+/-<br>0.35 | 0.9<br>107 | 0.062 | 2 |
| <i>mev-1</i><br>( <i>kn1</i> )                                        | 13.86<br>+/-<br>0.23 | 0.5<br>211  |  | 14.68<br>+/-<br>0.20 | 2.2<br>224 | 0.011 | 2 |
| <i>eat-2</i><br>( <i>ad1116</i> )                                     | 21.53<br>+/-<br>0.24 | 23.3<br>148 |  | 20.69<br>+/-<br>0.25 | 0.6<br>178 | 0.025 | 2 |
|                                                                       | Control RNAi         |             |  | <i>ceh-37</i> RNAi   |            |       |   |
| <i>isp-1</i><br>( <i>qm150</i> );<br><i>ctb-1</i><br>( <i>qm189</i> ) | 25.86<br>+/-<br>0.30 | 11.6<br>415 |  | 22.82<br>+/-<br>0.32 | 5.7<br>385 | 0.000 | 4 |
| Wild-type                                                             | 18.55<br>+/-<br>0.17 | 5.4<br>350  |  | 17.06<br>+/-<br>0.20 | 5.0<br>221 | 0.000 | 3 |
| <i>daf-16</i><br>( <i>mgDf47</i> )                                    | 11.69<br>+/-<br>0.14 | 3.1<br>96   |  | 11.88<br>+/-<br>0.17 | 3.1<br>96  | 0.288 | 2 |
| <i>age-1</i><br>( <i>hx546</i> )                                      | 25.49<br>+/-<br>0.45 | 3.0<br>233  |  | 27.63<br>+/-<br>0.51 | 0.0<br>123 | 0.062 | 3 |
|                                                                       | Control RNAi         |             |  | <i>lin-11</i> RNAi   |            |       |   |
| <i>isp-1</i><br>( <i>qm150</i> );<br><i>ctb-1</i>                     | 26.83<br>+/-<br>0.27 | 12.3<br>635 |  | 23.77<br>+/-<br>0.29 | 7.7<br>467 | 0.000 | 7 |

|                                                                       |                      |      |     |                      |      |     |            |
|-----------------------------------------------------------------------|----------------------|------|-----|----------------------|------|-----|------------|
| <i>(qm189)</i>                                                        |                      |      |     |                      |      |     |            |
| Wild-type                                                             | 19.52<br>+/-<br>0.21 | 1.7  | 287 | 17.78<br>+/-<br>0.18 | 6.4  | 280 | 0.000<br>5 |
| <i>daf-16</i><br>( <i>mgDf47</i> )                                    | 11.54<br>+/-<br>0.12 | 5.0  | 159 | 11.04<br>+/-<br>0.09 | 4.1  | 270 | 0.001<br>3 |
| <i>age-1</i><br>( <i>hx546</i> )                                      | 25.49<br>+/-<br>0.45 | 3.0  | 233 | 20.98<br>+/-<br>0.57 | 12.9 | 140 | 0.000<br>3 |
|                                                                       | Control RNAi         |      |     | <i>aha-1</i> RNAi    |      |     |            |
| <i>isp-1</i><br>( <i>qm150</i> );<br><i>ctb-1</i><br>( <i>qm189</i> ) | 26.32<br>+/-<br>0.23 | 9.2  | 736 | 23.41<br>+/-<br>0.23 | 7.5  | 682 | 0.000<br>8 |
| Wild-type                                                             | 20.40<br>+/-<br>0.15 | 3.9  | 510 | 18.36<br>+/-<br>0.14 | 5.0  | 537 | 0.000<br>7 |
| <i>daf-16</i><br>( <i>mgDf47</i> )                                    | 11.09<br>+/-<br>0.09 | 4.1  | 320 | 10.57<br>+/-<br>0.10 | 4.4  | 227 | 0.001<br>3 |
| <i>age-1</i><br>( <i>hx546</i> )                                      | 26.03<br>+/-<br>0.47 | 18.1 | 282 | 27.06<br>+/-<br>0.58 | 22.4 | 250 | 0.073<br>5 |
|                                                                       | Control RNAi         |      |     | <i>nhr-77</i> RNAi   |      |     |            |
| <i>isp-1</i><br>( <i>qm150</i> );<br><i>ctb-1</i><br>( <i>qm189</i> ) | 26.91<br>+/-<br>0.29 | 4.4  | 297 | 24.06<br>+/-<br>0.35 | 3.8  | 182 | 0.000<br>3 |
| Wild-type                                                             | 21.52<br>+/-<br>0.19 | 5.1  | 254 | 19.91<br>+/-<br>0.22 | 4.3  | 210 | 0.000<br>3 |
| <i>daf-16</i><br>( <i>mgDf47</i> )                                    | 11.74<br>+/-<br>0.11 | 4.3  | 234 | 10.58<br>+/-<br>0.12 | 3.6  | 195 | 0.000<br>3 |
| <i>age-1</i><br>( <i>hx546</i> )                                      | 28.38<br>+/-<br>0.56 | 14.8 | 189 | 24.17<br>+/-<br>0.63 | 15.3 | 118 | 0.000<br>3 |
