# Supplementary material for: The Homeobox Protein CEH-23 Mediates Prolonged Longevity in Response to Impaired Mitochondrial Electron Transport Chain in C. elegans
Source: PLoS Biol. 2011 Jun 21;9(6):e1001084. doi: 10.1371/journal.pbio.1001084 (PMC3119657; doi:10.1371/journal.pbio.1001084)
Supplement: Table S2 — Quantitative data and statistical analyses of adult lifespan of wild-type, ceh-23, isp-1;ctb-1, ceh-23;isp-1;ctb-1, isp-1, and ceh-23;isp-1 mutant worms. The data presented in Figure 2 are from Experiments 2 and 6. We tested up to six individuals' genetic isolates of isp-1;ctb-1;ceh-23 mutant worms and five individuals genetic isolates of ceh-23;isp-1 mutant worms. (PDF) [file pbio.1001084.s008.pdf]

**Table S2: Quantitative data and statistical analyses of adult lifespan of wild-type, *ceh-23*, *isp-1*; *ctb-1*, *ceh-23;isp-1;ctb-1*, *isp-1* and *ceh-23;isp-1* mutant worms on 1X and 10X concentrated OP50 bacteria (see Material and Methods). The data presented in Figure 2 are from Experiments 2 and 6. We tested up to six individuals genetic isolates of *ceh-23;isp-1;ctb-1* mutant worms and five individuals genetic isolates of *ceh-23;isp-1* mutant worms.**

| Strain                              | Mean adulthood lifespan (days) | +/- s.d (days) | censored worms (%) | n   | p-value (stratified log-rank test) compared to wild-type worms | p-value (stratified log-rank test) compared to <i>isp-1;ctb-1</i> worms | p-value (stratified log-rank test) compared to <i>isp-1</i> mutant worms |
|-------------------------------------|--------------------------------|----------------|--------------------|-----|----------------------------------------------------------------|-------------------------------------------------------------------------|--------------------------------------------------------------------------|
| <b>Experiment 1 OP50-1X</b>         |                                |                |                    |     |                                                                |                                                                         |                                                                          |
| Wild-type                           | 20.49                          | 0.28           | 0                  | 128 |                                                                |                                                                         |                                                                          |
| <i>ceh-23</i>                       | 20.91                          | 0.26           | 3                  | 107 | 0.584                                                          |                                                                         |                                                                          |
| <i>isp-1;ctb-1</i>                  | 27.23                          | 0.71           | 0                  | 73  | 0.000                                                          |                                                                         |                                                                          |
| <i>ceh-23;isp-1;ctb-1</i> Isolate 1 | 26.63                          | 0.38           | 13                 | 104 |                                                                | 0.006                                                                   |                                                                          |
| <i>ceh-23;isp-1;ctb-1</i> isolate 2 | 25.57                          | 0.43           | 8                  | 83  |                                                                | 0.000                                                                   |                                                                          |
| <i>ceh-23;isp-1;ctb-1</i> isolate 3 | 26.79                          | 0.51           | 0                  | 113 |                                                                | 0.180                                                                   |                                                                          |
| <b>Experiment 2 OP50-1X</b>         |                                |                |                    |     |                                                                |                                                                         |                                                                          |
| Wild-type                           | 17.78                          | 0.22           | 1                  | 116 |                                                                |                                                                         |                                                                          |
| <i>ceh-23</i>                       | 17.98                          | 0.23           | 0                  | 125 | 0.356                                                          |                                                                         |                                                                          |
| <i>isp-1;ctb-1</i>                  | 25.98                          | 0.55           | 0                  | 121 | 0.000                                                          |                                                                         |                                                                          |
| <i>ceh-23;isp-1;ctb-1</i> isolate 1 | 23.92                          | 0.48           | 0                  | 118 |                                                                | 0.001                                                                   |                                                                          |
| <i>ceh-23;isp-1;ctb-1</i> isolate 2 | 24.06                          | 0.43           | 0                  | 128 |                                                                | 0.000                                                                   |                                                                          |
| <i>ceh-23;isp-1;ctb-1</i> isolate 3 | 23.40                          | 0.49           | 2                  | 113 |                                                                | 0.000                                                                   |                                                                          |
| <i>ceh-23;isp-1;ctb-1</i> isolate 4 | 23.37                          | 0.44           | 2                  | 110 |                                                                | 0.000                                                                   |                                                                          |
| <i>ceh-23;isp-1;ctb-1</i> isolate 5 | 23.23                          | 0.44           | 0                  | 120 |                                                                | 0.000                                                                   |                                                                          |
| <i>ceh-23;isp-1;ctb-1</i> isolate 6 | 23.34                          | 0.46           | 0                  | 117 |                                                                | 0.000                                                                   |                                                                          |
| <b>Experiment 3 OP50-1X</b>         |                                |                |                    |     |                                                                |                                                                         |                                                                          |
| Wild-type                           | 19.28                          | 0.36           | 16                 | 74  |                                                                |                                                                         |                                                                          |
| <i>ceh-23</i>                       | 20.16                          | 0.33           | 7                  | 70  | 0.097                                                          |                                                                         |                                                                          |

|                                        |       |      |    |    |       |       |  |
|----------------------------------------|-------|------|----|----|-------|-------|--|
| <i>isp-1;ctb-1</i>                     | 29.63 | 0.72 | 11 | 73 | 0.000 |       |  |
| <i>ceh-23;isp-1;ctb-1</i><br>isolate 1 | 29.32 | 0.44 | 1  | 70 |       | 0.094 |  |
| <i>ceh-23;isp-1;ctb-1</i><br>isolate 2 | 27.45 | 0.66 | 3  | 69 |       | 0.008 |  |
| <i>ceh-23;isp-1;ctb-1</i><br>isolate 5 | 29.28 | 0.66 | 16 | 74 |       | 0.394 |  |

### **Experiment 3 OP50-10X**

|                                        |       |      |    |    |       |       |  |
|----------------------------------------|-------|------|----|----|-------|-------|--|
| <i>Wild-type</i>                       | 17.49 | 0.32 | 12 | 60 |       |       |  |
| <i>ceh-23</i>                          | 18.12 | 0.30 | 11 | 64 | 0.155 |       |  |
| <i>isp-1;ctb-1</i>                     | 23.98 | 0.63 | 15 | 67 | 0.000 |       |  |
| <i>ceh-23;isp-1;ctb-1</i><br>isolate 1 | 23.63 | 0.56 | 4  | 56 |       | 0.234 |  |
| <i>ceh-23;isp-1;ctb-1</i><br>isolate 2 | 24.40 | 0.71 | 12 | 49 |       | 0.713 |  |
| <i>ceh-23;isp-1;ctb-1</i><br>isolate 5 | 20.74 | 0.57 | 8  | 68 |       | 0.000 |  |

### **Experiment 4 OP50-10X**

|                                        |       |      |    |    |       |       |  |
|----------------------------------------|-------|------|----|----|-------|-------|--|
| <i>Wild-type</i>                       | 17.09 | 0.22 | 18 | 73 |       |       |  |
| <i>ceh-23</i>                          | 16.13 | 0.23 | 0  | 61 | 0.005 |       |  |
| <i>isp-1;ctb-1</i>                     | 21.74 | 0.75 | 24 | 66 | 0.000 |       |  |
| <i>ceh-23;isp-1;ctb-1</i><br>isolate 1 | 19.12 | 0.43 | 15 | 71 |       | 0.000 |  |
| <i>ceh-23;isp-1;ctb-1</i><br>isolate 2 | 19.25 | 0.77 | 25 | 64 |       | 0.001 |  |
| <i>ceh-23;isp-1;ctb-1</i><br>isolate 5 | 18.69 | 0.37 | 4  | 67 |       | 0.020 |  |

### **Experiment 5 OP50-1X**

|                                  |       |      |    |     |       |  |       |
|----------------------------------|-------|------|----|-----|-------|--|-------|
| <i>Wild-type</i>                 | 17.79 | 0.24 | 7  | 150 |       |  |       |
| <i>ceh-23</i>                    | 19.16 | 0.27 | 10 | 159 | 0.000 |  |       |
| <i>isp-1</i>                     | 25.43 | 0.71 | 1  | 95  | 0.000 |  |       |
| <i>ceh-23;isp-1</i><br>isolate 1 | 23.31 | 0.74 | 3  | 77  |       |  | 0.029 |
| <i>ceh-23;isp-1</i><br>isolate 2 | 21.40 | 1.22 | 0  | 30  |       |  | 0.004 |
| <i>ceh-23;isp-1</i><br>isolate 3 | 20.66 | 0.62 | 0  | 62  |       |  | 0.000 |
| <i>ceh-23;isp-1</i><br>isolate 4 | 20.00 | 0.66 | 15 | 41  |       |  | 0.000 |
| <i>ceh-23;isp-1</i><br>isolate 5 | 21.07 | 0.77 | 7  | 41  |       |  | 0.000 |

**Experiment 6 OP50-1X**

|                                  |       |      |   |     |       |  |       |
|----------------------------------|-------|------|---|-----|-------|--|-------|
| <i>Wild-type</i>                 | 18.72 | 0.38 | 7 | 151 |       |  |       |
| <i>ceh-23</i>                    | 18.57 | 0.35 | 0 | 82  | 0.057 |  |       |
| <i>isp-1</i>                     | 25.50 | 1.80 | 0 | 14  | 0.000 |  |       |
| <i>ceh-23;isp-1</i><br>isolate 1 | 20.40 | 0.80 | 5 | 87  |       |  | 0.015 |
| <i>ceh-23;isp-1</i><br>isolate 2 | 19.04 | 1.09 | 0 | 45  |       |  | 0.002 |
| <i>ceh-23;isp-1</i><br>isolate 3 | 18.76 | 0.95 | 2 | 79  |       |  | 0.015 |
| <i>ceh-23;isp-1</i><br>isolate 4 | 17.86 | 1.61 | 3 | 31  |       |  | 0.002 |
| <i>ceh-23;isp-1</i><br>isolate 5 | 21.24 | 1.17 | 0 | 41  |       |  | 0.050 |

**Experiment 7 OP50-1X**

|                                  |       |      |    |    |       |  |       |
|----------------------------------|-------|------|----|----|-------|--|-------|
| <i>Wild-type</i>                 | 16.76 | 0.26 | 1  | 93 |       |  |       |
| <i>ceh-23</i>                    | 19.70 | 0.30 | 0  | 73 | 0.000 |  |       |
| <i>isp-1</i>                     | 25.15 | 0.85 | 2  | 79 | 0.000 |  |       |
| <i>ceh-23;isp-1</i><br>isolate 3 | 23.95 | 0.69 | 3  | 75 |       |  | 0.030 |
| <i>ceh-23;isp-1</i><br>isolate 3 | 22.57 | 1.56 | 15 | 34 |       |  | 0.073 |

**Experiment 7 OP50-10X**

|                                  |       |      |    |     |       |  |       |
|----------------------------------|-------|------|----|-----|-------|--|-------|
| <i>Wild-type</i>                 | 15.61 | 0.27 | 9  | 53  |       |  |       |
| <i>ceh-23</i>                    | 15.40 | 0.27 | 8  | 78  | 0.752 |  |       |
| <i>isp-1</i>                     | 19.63 | 0.73 | 6  | 81  | 0.000 |  |       |
| <i>ceh-23;isp-1</i><br>isolate 4 | 19.01 | 0.98 | 5  | 35  |       |  | 0.398 |
| <i>ceh-23;isp-1</i><br>isolate 3 | 18.47 | 0.59 | 13 | 104 |       |  | 0.043 |
