# Supplementary material for: The Homeobox Protein CEH-23 Mediates Prolonged Longevity in Response to Impaired Mitochondrial Electron Transport Chain in C. elegans
Source: PLoS Biol. 2011 Jun 21;9(6):e1001084. doi: 10.1371/journal.pbio.1001084 (PMC3119657; doi:10.1371/journal.pbio.1001084)
Supplement: Table S3 — Quantitative data and statistical analyses of adult lifespan of rwEx16[ceh-23+mec-7::rfp] (injected with 10 ng/µl), rwEx17[ceh-23+mec-7::rfp] (injected with 1 ng/µl), rwEx18[mec-7::rfp], isp-1(qm150);ctb-1(qm189);rwEx16[ceh-23+mec-7::rfp], isp-1(qm150);ctb-1(qm189);rwEx18[mec-7::rfp], rwIs21[ceh-23+mec-7::rfp], ceh-23(ms23);isp-1(qm150);rwIs21[ceh-23+mec-7::rfp], and ceh-23(ms23);isp-1(qm150);rwIs19[mec-7::rfp] (see Experimental Procedures). The experiments presented in Figure 4 are from Experiments 1 and 5. (PDF) [file pbio.1001084.s009.pdf]

**Table S3: Quantitative data and statistical analyses of adult lifespan of *rwEx16[ceh-23+mec-7::rfp]* (injected with 10ng/μl), *rwEx17[ceh-23+mec-7::rfp]* (injected with 1ng/μl), *rwEx18[mec-7::rfp]*, *isp-1(qm150);ctb-1(qm189);rwEx16[ceh-23+mec-7::rfp]*, *isp-1(qm150);ctb-1(qm189);rwEx18[mec-7::rfp]*, *rwIs21[ceh-23+mec-7::rfp]*, *ceh-23(ms23);isp-1(qm150);rwIs21[ceh-23+mec-7::rfp]* and *ceh-23(ms23);isp-1(qm150);rwIs19[mec-7::rfp]* (see Experimental Procedures). The experiments presented in Figure 4 are from experiments 1 and 5.**

| Strain                                     | Mean adulthood lifespan (days) | +/- s.d (days) | censored worms (%) | n  | p-value (stratified log-rank test) compared to control <i>rwEx18[mec-7::rfp]</i> , line 3 in corresponding background |
|--------------------------------------------|--------------------------------|----------------|--------------------|----|-----------------------------------------------------------------------------------------------------------------------|
| <b>Wild-Type background</b>                |                                |                |                    |    |                                                                                                                       |
| <i>Experiment 1</i>                        |                                |                |                    |    |                                                                                                                       |
| <i>Control rwEx18[mec-7::rfp]</i>          |                                |                |                    |    |                                                                                                                       |
| Line 1                                     | 16.53                          | 0.33           | 18                 | 50 |                                                                                                                       |
| Line 2                                     | 16.11                          | 0.33           | 11                 | 63 |                                                                                                                       |
| Line 3                                     | 16.11                          | 0.27           | 2                  | 90 |                                                                                                                       |
| <i>rwEx17[ceh-23+mec-7::rfp] (1ng/μl)</i>  |                                |                |                    |    |                                                                                                                       |
| Line 1                                     | 16.90                          | 0.42           | 0                  | 42 | 0.022                                                                                                                 |
| Line 2                                     | 16.95                          | 0.23           | 0                  | 80 | 0.036                                                                                                                 |
| <i>rwEx16[ceh-23+mec-7::rfp] (10ng/μl)</i> |                                |                |                    |    |                                                                                                                       |
| Line 1                                     | 18.02                          | 0.44           | 8                  | 66 | 0.000                                                                                                                 |
| Line 2                                     | 19.27                          | 0.38           | 0                  | 75 | 0.000                                                                                                                 |
| Line 3                                     | 19.39                          | 0.38           | 3                  | 77 | 0.000                                                                                                                 |
| Line 4                                     | 19.87                          | 0.53           | 0                  | 52 | 0.000                                                                                                                 |
| <i>Experiment 2</i>                        |                                |                |                    |    |                                                                                                                       |
| <i>Control rwEx18[mec-7::rfp]</i>          |                                |                |                    |    |                                                                                                                       |
| Line 1                                     | 16.25                          | 0.28           | 1                  | 84 |                                                                                                                       |
| Line 2                                     | 16.55                          | 0.24           | 0                  | 66 |                                                                                                                       |
| Line 3                                     | 15.60                          | 0.70           | 0                  | 20 |                                                                                                                       |
| <i>rwEx17[ceh-23+mec-7::rfp] (1ng/μl)</i>  |                                |                |                    |    |                                                                                                                       |
| Line 1                                     | 16.99                          | 0.29           | 4                  | 71 | 0.060                                                                                                                 |
| Line 2                                     | 15.75                          | 0.19           | 2                  | 87 | 0.590                                                                                                                 |
| Line 3                                     | 16.27                          | 0.43           | 6                  | 16 | 0.686                                                                                                                 |
| <i>rwEx16[ceh-23+mec-7::rfp] (10ng/μl)</i> |                                |                |                    |    |                                                                                                                       |
| Line 1                                     | 16.75                          | 0.20           | 0                  | 80 | 0.070                                                                                                                 |
| Line 2                                     | 16.66                          | 0.18           | 1                  | 89 | 0.093                                                                                                                 |
| Line 3                                     | 16.77                          | 0.20           | 3                  | 61 | 0.071                                                                                                                 |
| Line 4                                     | 18.69                          | 0.30           | 0                  | 98 | 0.000                                                                                                                 |

|                                                                    |       |      |    |     |       |
|--------------------------------------------------------------------|-------|------|----|-----|-------|
| <b>Experiment 3</b>                                                |       |      |    |     |       |
| <b>Control <i>rwEx18[mec-7::rfp]</i></b>                           |       |      |    |     |       |
| Line 1                                                             | 14.30 | 0.22 | 4  | 122 |       |
| Line 3                                                             | 14.23 | 0.28 | 7  | 115 |       |
| <b><i>rwEx16[ceh-23+mec-7::rfp]</i> (10ng/<math>\mu</math>l)</b>   |       |      |    |     |       |
| Line 4                                                             | 16.53 | 0.34 | 1  | 92  | 0.000 |
| Line 5                                                             | 16.59 | 0.27 | 18 | 51  | 0.000 |
| Line 6                                                             | 16.06 | 0.23 | 13 | 121 | 0.000 |
| Line 7                                                             | 15.07 | 0.24 | 9  | 99  | 0.107 |
| <b>Experiment 4</b>                                                |       |      |    |     |       |
| <b>Control <i>rwEx18[mec-7::rfp]</i></b>                           |       |      |    |     |       |
| Line 3                                                             | 14.89 | 0.17 | 6  | 107 |       |
| <b><i>rwEx16[ceh-23+mec-7::rfp]</i> (10ng/<math>\mu</math>l)</b>   |       |      |    |     |       |
| Line 1                                                             | 15.88 | 0.16 | 4  | 92  | 0.000 |
| Line 4                                                             | 16.47 | 0.32 | 0  | 110 | 0.000 |
| <b>Experiment 5</b>                                                |       |      |    |     |       |
| <b>Control <i>rwEx18[mec-7::rfp]</i></b>                           |       |      |    |     |       |
| Line 3                                                             | 16.84 | 0.29 | 3  | 74  |       |
| <b><i>rwEx16[ceh-23+mec-7::rfp]</i> (10ng/<math>\mu</math>l)</b>   |       |      |    |     |       |
| Line 1                                                             | 17.84 | 0.31 | 4  | 103 | 0.022 |
| Line 3                                                             | 18.44 | 0.32 | 6  | 99  | 0.000 |
| Line 4                                                             | 18.28 | 0.31 | 3  | 117 | 0.001 |
| Line 5                                                             | 21.08 | 0.44 | 10 | 95  | 0.000 |
| <b>Experiment 6</b>                                                |       |      |    |     |       |
| <b>Control <i>rwEx18[mec-7::rfp]</i></b>                           |       |      |    |     |       |
| Line 3                                                             | 18.72 | 0.33 | 12 | 107 |       |
| <b><i>rwEx16[ceh-23+mec-7::rfp]</i> (10ng/<math>\mu</math>l)</b>   |       |      |    |     |       |
| Line 1                                                             | 17.84 | 0.25 | 6  | 121 | 0.021 |
| Line 3                                                             | 17.97 | 0.31 | 11 | 119 | 0.118 |
| Line 4                                                             | 19.67 | 0.39 | 2  | 99  | 0.019 |
| Line 5                                                             | 21.66 | 0.33 | 12 | 119 | 0.000 |
| <b><i>isp-1;ctb-1</i> background</b>                               |       |      |    |     |       |
| <b>Experiment 4</b>                                                |       |      |    |     |       |
| <b>Control <i>isp-1(qm150);ctb-1(qm189);rwEx18[mec-7::rfp]</i></b> |       |      |    |     |       |
| Line 3                                                             | 17.73 | 0.30 | 7  | 106 |       |
| <b><i>isp-1(qm150);ctb-1(qm189);rwEx16[ceh-23+mec-7::rfp]</i></b>  |       |      |    |     |       |
| Line 1                                                             | 16.40 | 0.32 | 5  | 120 | 0.005 |
| Line 4                                                             | 19.50 | 0.47 | 6  | 105 | 0.001 |
| <b>Experiment 5</b>                                                |       |      |    |     |       |
| <b>Control <i>isp-1(qm150);ctb-1(qm189);rwEx18[mec-7::rfp]</i></b> |       |      |    |     |       |
| Line 3                                                             | 20.27 | 0.45 | 15 | 116 |       |

|                                                             |       |      |    |     |                                                                                         |
|-------------------------------------------------------------|-------|------|----|-----|-----------------------------------------------------------------------------------------|
| <i>isp-1(qm150);ctb-1(qm189);rwEx16[ceh-23+mec-7::rfp]</i>  |       |      |    |     |                                                                                         |
| Line 1                                                      | 19.75 | 0.55 | 23 | 97  | 0.504                                                                                   |
| Line 3                                                      | 22.48 | 0.53 | 5  | 111 | 0.001                                                                                   |
| Line 4                                                      | 25.23 | 0.72 | 8  | 124 | 0.000                                                                                   |
| <b>Experiment 6</b>                                         |       |      |    |     |                                                                                         |
| <i>Control isp-1(qm150);ctb-1(qm189);rwEx18[mec-7::rfp]</i> |       |      |    |     |                                                                                         |
| Line 3                                                      | 22.04 | 0.37 | 7  | 117 |                                                                                         |
| <i>isp-1(qm150);ctb-1(qm189);rwEx16[ceh-23+mec-7::rfp]</i>  |       |      |    |     |                                                                                         |
| Line 1                                                      | 20.40 | 0.44 | 15 | 106 | 0.016                                                                                   |
| Line 3                                                      | 21.58 | 0.57 | 4  | 104 | 0.586                                                                                   |
| Line 4                                                      | 26.31 | 0.61 | 9  | 107 | 0.000                                                                                   |
| <i>ceh-23(ms23);isp-1(qm150) background</i>                 |       |      |    |     |                                                                                         |
| <b>Experiment 7</b>                                         |       |      |    |     |                                                                                         |
|                                                             |       |      |    |     | p-value (stratified log-rank test)                                                      |
| Wild-type                                                   | 17.17 | 0.17 | 9  | 105 |                                                                                         |
| <i>rwIs21[ceh-23+mec-7::rfp]</i>                            | 17.34 | 0.22 | 28 | 105 | 0.488 (compared to wild-type)                                                           |
| <i>ceh-23(ms23);isp-1(qm150);rwIs19[mec-7::rfp]</i>         | 19.30 | 0.72 | 11 | 104 |                                                                                         |
| <i>ceh-23(ms23);isp-1(qm150);rwIs21[ceh-23+mec-7::rfp]</i>  | 27.16 | 0.59 | 3  | 100 | 0.000 ((compared to <i>ceh-23(ms23);isp-1(qm150);rwIs19[mec-7::rfp]</i> )               |
| <b>RNAi experiments</b>                                     |       |      |    |     |                                                                                         |
|                                                             |       |      |    |     | p-value (stratified log-rank test) compared to empty vector in corresponding background |
| <b>Experiment 8</b>                                         |       |      |    |     |                                                                                         |
| <i>Control rwEx18[mec-7::rfp]</i>                           |       |      |    |     |                                                                                         |
| Line 3+empty vector                                         | 13.20 | 0.35 | 5  | 125 |                                                                                         |
| Line 3+ <i>ceh-23</i> RNAi                                  | 14.15 | 0.38 | 4  | 136 | 0.079                                                                                   |
| <i>rwEx16[ceh-23+mec-7::rfp] (10ng/μl)</i>                  |       |      |    |     |                                                                                         |
| Line 5+ empty vector                                        | 16.44 | 0.45 | 8  | 102 |                                                                                         |
| Line 5+ <i>ceh-23</i> RNAi                                  | 13.52 | 0.35 | 2  | 166 | 0.000                                                                                   |
| <b>Experiment 9</b>                                         |       |      |    |     |                                                                                         |
| <i>Control rwEx18[mec-7::rfp]</i>                           |       |      |    |     |                                                                                         |
| Line 3+empty vector                                         | 13.63 | 0.36 | 5  | 128 |                                                                                         |
| Line 3+ <i>ceh-23</i> RNAi                                  | 12.80 | 0.28 | 6  | 162 | 0.065                                                                                   |

|                                                   |       |      |   |     |       |
|---------------------------------------------------|-------|------|---|-----|-------|
| <b><i>rwEx16[ceh-23+mec-7::rfp] (10ng/μl)</i></b> |       |      |   |     |       |
| <i>Line 5+ empty vector</i>                       | 15.51 | 0.44 | 4 | 111 |       |
| <i>Line 5+ ceh-23 RNAi</i>                        | 13.03 | 0.31 | 2 | 143 | 0.000 |
| <b>Experiment 10</b>                              |       |      |   |     |       |
| <b><i>Control rwEx18[mec-7::rfp]</i></b>          |       |      |   |     |       |
| <i>Line 3+empty vector</i>                        | 12.92 | 0.36 | 1 | 146 |       |
| <i>Line 3+ ceh-23 RNAi</i>                        | 12.94 | 0.37 | 4 | 143 | 0.947 |
| <b><i>rwEx16[ceh-23+mec-7::rfp] (10ng/μl)</i></b> |       |      |   |     |       |
| <i>Line 5+ empty vector</i>                       | 15.41 | 0.43 | 0 | 99  |       |
| <i>Line 5+ ceh-23 RNAi</i>                        | 12.55 | 0.41 | 1 | 101 | 0.000 |
